# Supplementary material for: Evaluating phenotype-driven approaches for genetic diagnoses from exomes in a clinical setting
Source: PubMed Central journal article supplement (PMC5647373; doi:10.1038/s41598-017-13841-y), 2017-10-18
Supplement: 41598_2017_13841_MOESM1_ESM.pdf [file 41598_2017_13841_MOESM1_ESM.pdf]

**Supplementary material to: Evaluating phenotype-driven approaches for genetic diagnoses from exomes in a clinical setting**

Reuben J. Pengelly<sup>1\*</sup>, Thahmina Alom<sup>1</sup>, Zijian Zhang<sup>1</sup>, David Hunt<sup>2</sup>, Sarah Ennis<sup>1</sup>, Andrew Collins<sup>1</sup>

1. Genetic Epidemiology and Genomic Informatics,

Faculty of Medicine,

University of Southampton,

Duthie Building (808),

Tremona Road, Southampton, SO16 6YD, UK.

Tel: 44(0)2381204424; Fax: 44(0)2381204264.

Email: [R.J.Pengelly@soton.ac.uk](mailto:R.J.Pengelly@soton.ac.uk)

2. Wessex Clinical Genetics Service

Level G, Mailpoint 105

Princess Anne Hospital

Coxford Road

Southampton

SO16 5YA

\*Corresponding author

**Supplementary Table 1: HPO terms used as input for each of the patients**

| <b>Patient</b> | <b>HPO ID</b>                  | <b>Label</b>                            |
|----------------|--------------------------------|-----------------------------------------|
| <b>1</b>       | HP:0011968                     | Feeding difficulties                    |
|                | HP:0001249                     | Intellectual disability                 |
|                | HP:0001028                     | Hemangioma                              |
|                | HP:0000964                     | Eczema                                  |
|                | HP:0001388                     | Joint laxity                            |
|                | HP:0008398                     | Hypoplastic fifth fingernail            |
|                | HP:0000750                     | Delayed speech and language development |
|                | HP:0001007                     | Hirsutism                               |
|                | HP:0000400                     | Macrotia                                |
|                | HP:0001558                     | Decreased fetal movement                |
|                | HP:0000218                     | High palate                             |
|                | HP:0002650                     | Scoliosis                               |
|                | HP:0000347                     | Micrognathia                            |
| <b>2</b>       | HP:0003808                     | Abnormal muscle tone                    |
|                | HP:0001344                     | Absent speech                           |
|                | HP:0002305                     | Athetosis                               |
|                | HP:0001249                     | Intellectual disability                 |
|                | HP:0012450                     | Chronic constipation                    |
|                | HP:0001250                     | Seizures                                |
|                | HP:0004322                     | Short stature                           |
|                | HP:0002307                     | Drooling                                |
|                | HP:0000486                     | Strabismus                              |
|                | HP:0008872                     | Feeding difficulties in infancy         |
|                | HP:0011344                     | Severe global developmental delay       |
|                | HP:0100021                     | Cerebral palsy                          |
|                | HP:0004374                     | Hemiplegia/hemiparesis                  |
| <b>3</b>       | HP:0001249                     | Intellectual disability                 |
|                | HP:0002530                     | Axial dystonia                          |
|                | HP:0007010                     | Poor fine motor coordination            |
|                | HP:0001336                     | Myoclonus                               |
|                | HP:0100543                     | Cognitive impairment                    |
| <b>4</b>       | HP:0001537                     | Umbilical hernia                        |
|                | HP:0000322                     | Short philtrum                          |
|                | HP:0000582                     | Upslanted palpebral fissure             |
|                | HP:0001382                     | Joint hypermobility                     |
|                | HP:0000717                     | Autism                                  |
|                | HP:0008398                     | Hypoplastic fifth fingernail            |
|                | HP:0001263                     | Global developmental delay              |
|                | HP:0006863                     | Severe expressive language delay        |
| HP:0010864     | Intellectual disability,severe |                                         |

|          |            |                                              |
|----------|------------|----------------------------------------------|
|          | HP:0005681 | Juvenile rheumatoid arthritis                |
|          | HP:0000248 | Brachycephaly                                |
|          | HP:0010808 | Protruding tongue                            |
|          | HP:0000664 | Synophrys                                    |
|          | HP:0002136 | Broad-based gait                             |
|          | HP:0000316 | Hypertelorism                                |
|          | HP:0000540 | Hypermetropia                                |
|          | HP:0000414 | Bulbous nose                                 |
|          | HP:0001182 | Tapered finger                               |
| <b>5</b> | HP:0003273 | Hip contracture                              |
|          | HP:0002058 | Myopathic facies                             |
|          | HP:0001290 | Generalized hypotonia                        |
|          | HP:0006380 | Knee flexion contracture                     |
|          | HP:0001388 | Joint laxity                                 |
|          | HP:0000268 | Dolichocephaly                               |
|          | HP:0001488 | Bilateral ptosis                             |
|          | HP:0002194 | Delayed gross motor development              |
|          | HP:0002355 | Difficulty walking                           |
|          | HP:0001657 | Prolonged QT interval                        |
|          | HP:0002650 | Scoliosis                                    |
|          | HP:0003803 | Type 1 muscle fiber predominance             |
|          | HP:0004347 | Weakness of muscles of respiration           |
|          | HP:0002783 | Recurrent lower respiratory tract infections |
| <b>6</b> | HP:0011344 | Severe global developmental delay            |
|          | HP:0002069 | Generalized tonic-clonic seizures            |
|          | HP:0012469 | Infantile spasms                             |
|          | HP:0002521 | Hypsarrhythmia                               |
|          | HP:0007565 | Multiple cafe-au-lait spots                  |
|          | HP:0100814 | Blue nevus                                   |
| <b>7</b> | HP:0000640 | Gaze-evoked nystagmus                        |
|          | HP:0002080 | Intention tremor                             |
|          | HP:0002370 | Poor coordination                            |
|          | HP:0001272 | Cerebellar atrophy                           |
|          | HP:0002936 | Distal sensory impairment                    |
|          | HP:0001260 | Dysarthria                                   |
|          | HP:0002317 | Unsteady gait                                |
|          | HP:0003390 | Sensory axonal neuropathy                    |
|          | HP:0003487 | Babinski sign                                |
| <b>8</b> | HP:0011344 | Severe global developmental delay            |
|          | HP:0001601 | Laryngomalacia                               |
|          | HP:0002069 | Generalized tonic-clonic seizures            |
|          | HP:0008504 | Moderate sensorineural hearing impairment    |
|          | HP:0002136 | Broad-based gait                             |
|          | HP:0012011 | EEG with occipital focal spike waves         |

|           |            |                                                |
|-----------|------------|------------------------------------------------|
|           | HP:0002395 | Lower limb hyperreflexia                       |
|           | HP:0000253 | Progressive microcephaly                       |
|           | HP:0010845 | EEG with generalized slow activity             |
|           | HP:0000733 | Stereotypic behavior                           |
|           | HP:0000494 | Downslanted palpebral fissures                 |
| <b>9</b>  | HP:0000256 | Macrocephaly                                   |
|           | HP:0012721 | Venous malformation                            |
|           | HP:0002019 | Constipation                                   |
|           | HP:0000965 | Cutis marmorata                                |
|           | HP:0001622 | Premature birth                                |
|           | HP:0001270 | Motor delay                                    |
|           | HP:0002013 | Vomiting                                       |
|           | HP:0011471 | Gastrostomy tube feeding in infancy            |
| <b>10</b> | HP:0002562 | Low-set nipples                                |
|           | HP:0002600 | Hyporeflexia of lower limbs                    |
|           | HP:0000426 | Prominent nasal bridge                         |
|           | HP:0012650 | Perisylvian polymicrogyria                     |
|           | HP:0002987 | Elbow flexion contracture                      |
|           | HP:0000268 | Dolichocephaly                                 |
|           | HP:0008780 | Congenital bilateral hip dislocation           |
|           | HP:0006610 | Wide intermamillary distance                   |
|           | HP:0002355 | Difficulty walking                             |
|           | HP:0005750 | Contractures of the joints of the lower limbs  |
|           | HP:0006201 | Hypermobility of distal interphalangeal joints |
|           | HP:0000218 | High palate                                    |
|           | HP:0005850 | Congenital talipes calcaneovalgus              |
|           | HP:0007002 | Motor axonal neuropathy                        |
|           | HP:0000347 | Micrognathia                                   |
|           | HP:0011167 | Focal tonic seizures                           |
| <b>11</b> | HP:0012368 | Flat face                                      |
|           | HP:0001251 | Ataxia                                         |
|           | HP:0002123 | Generalized myoclonic seizures                 |
|           | HP:0000252 | Microcephaly                                   |
|           | HP:0000750 | Delayed speech and language development        |
| <b>12</b> | HP:0011968 | Feeding difficulties                           |
|           | HP:0000369 | Low-set ears                                   |
|           | HP:0008551 | Microtia                                       |
|           | HP:0000347 | Micrognathia                                   |
|           | HP:0000316 | Hypertelorism                                  |
|           | HP:0000494 | Downslanted palpebral fissures                 |
|           | HP:0005439 | Maxillozygomatic hypoplasia                    |
| <b>13</b> | HP:0000528 | Anophthalmia                                   |
|           | HP:0007633 | Bilateral microphthalmos                       |
|           | HP:0008551 | Microtia                                       |

|            |                                              |                                           |
|------------|----------------------------------------------|-------------------------------------------|
| <b>14</b>  | HP:0001028                                   | Hemangioma                                |
|            | HP:0001642                                   | Pulmonic stenosis                         |
|            | HP:0001290                                   | Generalized hypotonia                     |
|            | HP:0000431                                   | Wide nasal bridge                         |
|            | HP:0001263                                   | Global developmental delay                |
|            | HP:0002643                                   | Neonatal respiratory distress             |
|            | HP:0002360                                   | Sleep disturbance                         |
|            | HP:0000954                                   | Single transverse palmar crease           |
|            | HP:0000316                                   | Hypertelorism                             |
|            | HP:0000286                                   | Epicanthus                                |
|            | HP:0001631                                   | Atria septal defect                       |
| HP:0002783 | Recurrent lower respiratory tract infections |                                           |
| <b>15</b>  | HP:0011315                                   | Unicoronal synostosis                     |
|            | HP:0000486                                   | Strabismus                                |
|            | HP:0002119                                   | Ventriculomegaly                          |
|            | HP:0000456                                   | Bifid nasal tip                           |
|            | HP:0001545                                   | Anteriorly placed anus                    |
|            | HP:0001290                                   | Generalized hypotonia                     |
|            | HP:0001274                                   | Agenesis of corpus callosum               |
|            | HP:0000316                                   | Hypertelorism                             |
|            | HP:0000540                                   | Hypermetropia                             |
| HP:0001388 | Joint laxity                                 |                                           |
| <b>16</b>  | HP:0001250                                   | Seizures                                  |
|            | HP:0001348                                   | Brisk reflexes                            |
|            | HP:0001508                                   | Failure to thrive                         |
|            | HP:0001639                                   | Hypertrophic cardiomyopathy               |
|            | HP:0008873                                   | Disproportionate short-limb short stature |
|            | HP:0001357                                   | Plagiocephaly                             |
|            | HP:0001998                                   | Neonatal hypoglycemia                     |
|            | HP:0011470                                   | Nasogastric tube feeding in infancy       |
|            | HP:0001263                                   | Global developmental delay                |
|            | HP:0002643                                   | Neonatal respiratory distress             |
|            | HP:0100501                                   | Recurrent bronchiolitis                   |
|            | HP:0000470                                   | Short neck                                |
|            | HP:0000280                                   | Coarse facial features                    |
|            | HP:0001561                                   | Polyhydramnios                            |
|            | HP:0000954                                   | Single transverse palmar crease           |
| HP:0011675 | Arrhythmia                                   |                                           |
| <b>17</b>  | HP:0000369                                   | Low-set ears                              |
|            | HP:0000884                                   | Prominent sternum                         |
|            | HP:0004309                                   | Ventricular preexcitation                 |
|            | HP:0001642                                   | Pulmonic stenosis                         |
|            | HP:0007018                                   | Attention deficit hyperactivity disorder  |
|            | HP:0000540                                   | Hypermetropia                             |

|           |            |                                                 |
|-----------|------------|-------------------------------------------------|
|           | HP:0000028 | Cryptorchidism                                  |
|           | HP:0000494 | Downslanted palpebral fissures                  |
|           | HP:0000286 | Epicanthus                                      |
|           | HP:0000431 | Wide nasal bridge                               |
| <b>18</b> | HP:0008209 | Premature ovarian failure                       |
|           | HP:0000786 | Primary amenorrhea                              |
|           | HP:0002069 | Generalized tonic-clonic seizures               |
|           | HP:0002073 | Progressive cerebellar ataxia                   |
|           | HP:0012429 | Aplasia/Hypoplasia of the cerebral white matter |
|           | HP:0008639 | Gonadal hypoplasia                              |
| <b>19</b> | HP:0005280 | Depressed nasal bridge                          |
|           | HP:0011318 | Bicoronal synostosis                            |
|           | HP:0002007 | Frontal bossing                                 |
|           | HP:0000218 | High palate                                     |
|           | HP:0001901 | Polycythemia                                    |
|           | HP:0000494 | Downslanted palpebral fissures                  |
|           | HP:0001998 | Neonatal hypoglycemia                           |
|           | HP:0005487 | Prominent metopic ridge                         |
| <b>20</b> | HP:0001488 | Bilateral ptosis                                |
|           | HP:0006834 | Developmental stagnation at onset of seizures   |
|           | HP:0001251 | Ataxia                                          |
|           | HP:0002121 | Absence seizures                                |
|           | HP:0000572 | Visual loss                                     |
|           | HP:0001263 | Global developmental delay                      |
| <b>21</b> | HP:0002515 | Waddling gait                                   |
|           | HP:0005060 | Limited elbow flexion/extension                 |
|           | HP:0008873 | Disproportionate short-limb short stature       |
|           | HP:0009882 | Short distal phalanx of finger                  |
|           | HP:0005085 | Limited knee flexion/extension                  |
|           | HP:0001182 | Tapered finger                                  |
